# Supplementary material for: Defect-free solvothermally assisted synthesis of microspherical mesoporous LiFePO4/C
Source: Royal Society of Chemistry journal article supplement (doi:10.1039/c2ra22965j), 2013-01-01
Supplement: c2ra22965j.pdf [file c2ra22965j.pdf]

# **Electronic Supplementary Information (ESI)**

## **Defect-free solvothermally assisted synthesis of microspherical mesoporous LiFePO<sub>4</sub>/C**

Min-Young Cho,<sup>a,b</sup> Kwang-Bum Kim,<sup>b</sup> Jae-Won Lee,<sup>c</sup> Haegyeom Kim,<sup>d</sup> Hyungsub Kim,<sup>d</sup> Kisuk Kang<sup>d</sup> and Kwang Chul Roh<sup>\*a</sup>

<sup>a</sup> *Energy Materials Center, Green Ceramics Division, Korea Institute of Ceramic Engineering & Technology, 233-5 Gasan-dong, Guemcheon-Gu, Seoul 153-801, Republic of Korea. E-mail: [rkc@kicet.re.kr](mailto:rkc@kicet.re.kr); Fax: +82-2-3282-2475; Tel: +82-2-3282-2463*

<sup>b</sup> *Department of Materials Science & Engineering, Yonsei University, 50 Yonsei-ro, Seodaemun-Gu, Seoul 120-749, Republic of Korea*

<sup>c</sup> *Department of Energy Engineering, Dankook University, Cheonan 330-714, Republic of Korea*

<sup>d</sup> *Department of Materials Science and Engineering, Seoul National University, 599 Gwanak-ro, Gwanak-gu, Seoul 151-741, Republic of Korea.*

## The synthesis method of $\text{LiFePO}_4$ precursor using water solvent

Stoichiometric amounts of 0.028 mol lithium acetate hydrate ( $\text{CH}_3\text{COOLi}\cdot 2\text{H}_2\text{O}$ ), iron(III) nitrate hydrate ( $\text{Fe}(\text{NO}_3)_3\cdot 9\text{H}_2\text{O}$ ), and phosphoric acid (85 wt.%,  $\text{H}_3\text{PO}_4$ ) were dissolved in 40 mL distilled water. The mixture was stirred for 0.5 h and transferred to a 100 mL Teflon-lined autoclave. The autoclave was sealed and heated to 160 °C for 2 h. After cooling to room temperature, the precursor was obtained by filtration, washed with distilled water, and dried in air at 80 °C for 24 h.

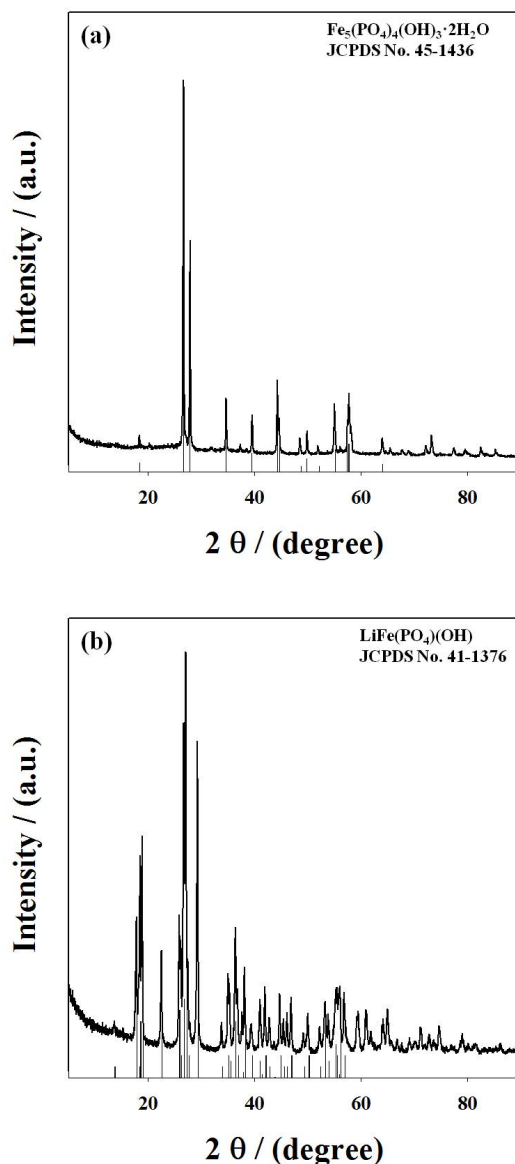

**Fig. S1.** XRD patterns of the precursors prepared using (a) water or (b) ethanol as the solvent.

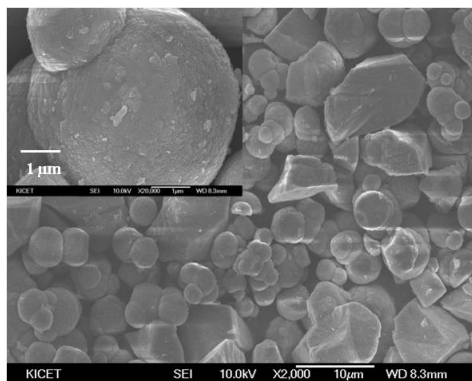

**Fig. S2.** FE-SEM imaging of the precursor prepared using water as the solvent.

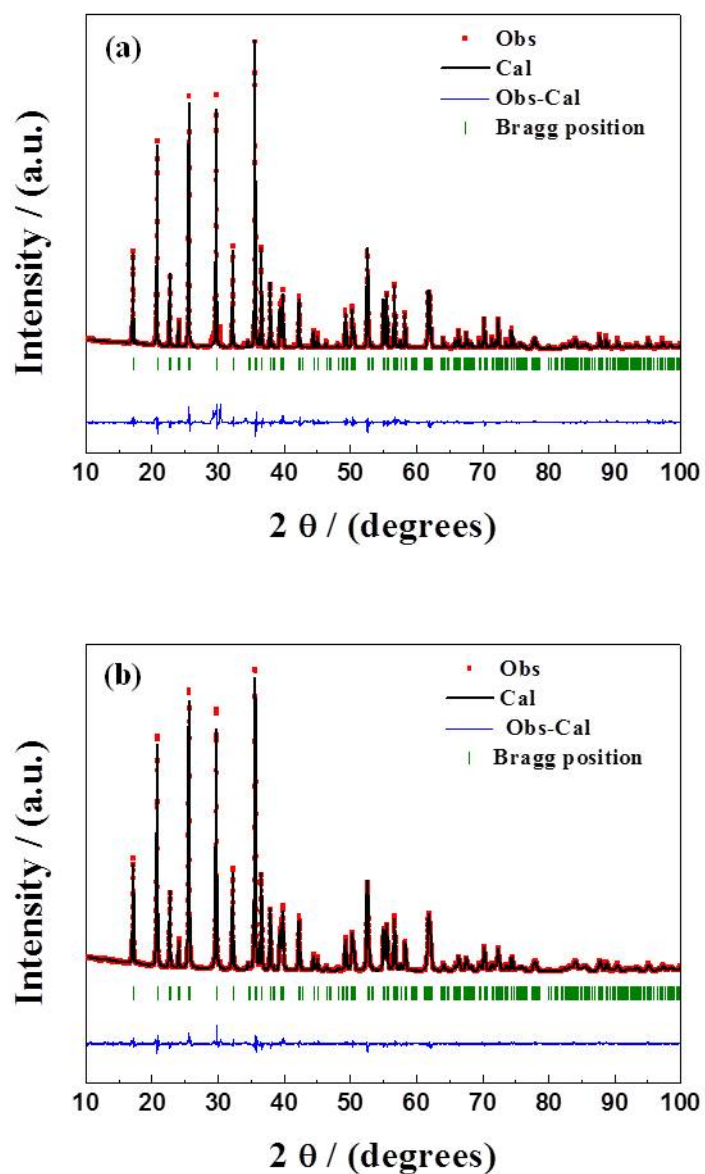

**Fig. S3.** Rietveld refinement of XRD spectra of (a) bare LiFePO<sub>4</sub> and (b) LiFePO<sub>4</sub>/C. R-factors are  $R_p = 8.49\%$ ,  $R_I = 7.90\%$ ,  $R_F = 3.83\%$  and  $S = 2.65$  for bare LiFePO<sub>4</sub>, and  $R_p = 4.67\%$ ,  $R_I = 8.02\%$ ,  $R_F = 1.70\%$ , and  $S = 0.639$  for LiFePO<sub>4</sub>/C.

**Table S1.** Lattice parameters and Rietveld refinement results for bare LiFePO<sub>4</sub> and LiFePO<sub>4</sub>/C

|                             |                  |             |              |             |                          |                      |          |              |
|-----------------------------|------------------|-------------|--------------|-------------|--------------------------|----------------------|----------|--------------|
| Bare<br>LiFePO <sub>4</sub> | a (Å)            | b (Å)       | c (Å)        |             | Volume (Å <sup>3</sup> ) | Antisite defects (%) |          |              |
|                             | 10.321014(7)     | 6.001056(4) | 4.687696(3)  |             | 290.3418                 | 0.992                |          |              |
|                             | Atom             | Site        | Multiplicity | X           | y                        | Z                    | Biso     | Occupancy    |
|                             | Li <sup>+1</sup> | Li1         | 4            | 0           | 0                        | 0                    | 2.2(3)   | 0.495040(12) |
|                             | Fe <sup>+2</sup> | Li1         | 4            | 0           | 0                        | 0                    | 2.2(3)   | 0.004960(12) |
|                             | P                | P1          | 4            | 0.0950(2)   | 0.25000                  | 0.4184(5)            | 1.38(7)  | 0.50000      |
|                             | O <sup>-2</sup>  | O1          | 4            | 0.0968(6)   | 0.25000                  | 0.7432(12)           | 1.68(15) | 0.50000      |
| LiFePO <sub>4</sub> /C      | a (Å)            | b (Å)       | c (Å)        |             | Volume (Å <sup>3</sup> ) | Antisite defects (%) |          |              |
|                             | 10.317427(8)     | 5.999850(4) | 4.688508(4)  |             | 290.2328                 | 0.990                |          |              |
|                             | Atom             | Site        | Multiplicity | x           | y                        | z                    | Biso     | Occupancy    |
|                             | Li <sup>+1</sup> | Li1         | 4            | 0           | 0                        | 0                    | 2.5(2)   | 0.495050(8)  |
|                             | Fe <sup>+2</sup> | Li1         | 4            | 0           | 0                        | 0                    | 2.5(2)   | 0.004950(8)  |
|                             | P                | P1          | 4            | 0.09525(16) | 0.25000                  | 0.4182(4)            | 1.37(5)  | 0.50000      |
|                             | O <sup>-2</sup>  | O1          | 4            | 0.0950(4)   | 0.25000                  | 0.7425(8)            | 1.34(10) | 0.50000      |
| O <sup>-2</sup>             | O2               | 4           | 0.4565(4)    | 0.25000     | 0.2066(7)                | 1.11(9)              | 0.50000  |              |
| O <sup>-2</sup>             | O3               | 8           | 0.1645(3)    | 0.0486(4)   | 0.2853(4)                | 1.09(7)              | 1.00000  |              |

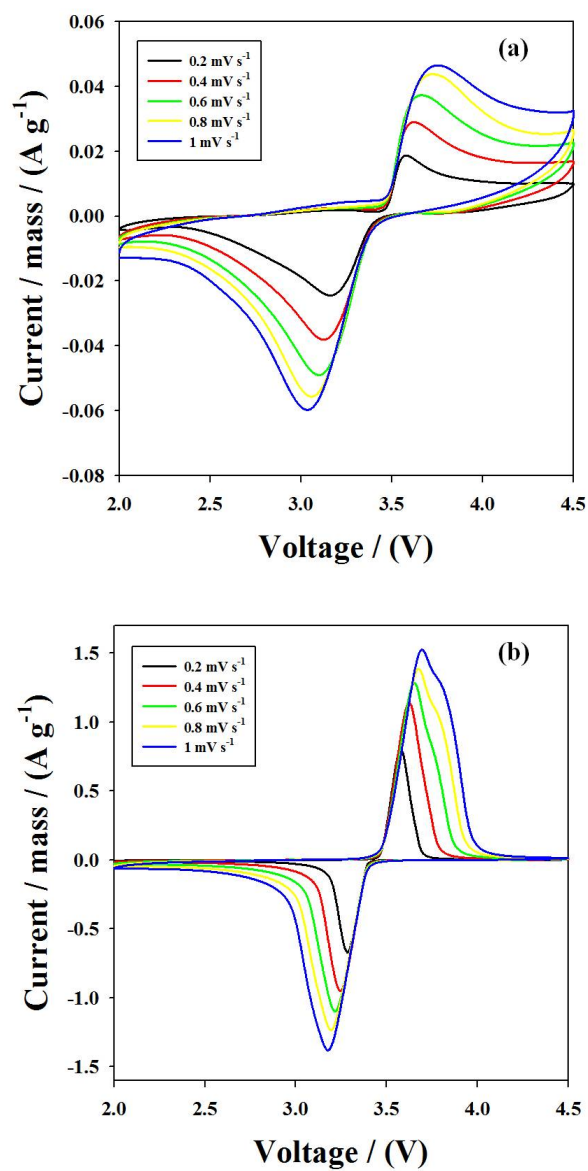

**Fig. S4.** Cyclic voltammograms for (a) bare LiFePO<sub>4</sub> and (b) LiFePO<sub>4</sub>/C (scan rate: 0.2–1 mV s<sup>-1</sup>, voltage range: 2.0–4.5 V).
